# Supplementary material for: Research on Optimal Cooling Landscape Combination and Configuration Based on Local Climate Zones—Fuzhou, China
Source: MDPI journal article supplement (doi:10.3390/su16062367), 2024-03-13
Supplement: s1 [file s1]

**Table S1.** Confusion matrix of LCZ classification maps for Fuzhou central urban area, 2013.

[illegible]

**Table S2.** Confusion matrix of LCZ classification maps for Fuzhou central urban area, 2016.

[illegible]

**Table S3.** Confusion matrix of LCZ classification maps for Fuzhou central urban area, 2021.

| LCZ       | 1  | 2  | 3 | 4  | 5  | 6 | 7 | 8  | 9  | 10           | A  | B | C  | D  | E | F  | G  | UA (%) | PA (%) |
|-----------|----|----|---|----|----|---|---|----|----|--------------|----|---|----|----|---|----|----|--------|--------|
| 1         | 24 | 2  | 0 | 12 | 0  | 0 | 0 | 0  | 0  | 0            | 0  | 0 | 0  | 0  | 0 | 0  | 0  | 100.00 | 33.33  |
| 2         | 3  | 19 | 0 | 9  | 1  | 0 | 0 | 0  | 0  | 0            | 0  | 0 | 0  | 1  | 0 | 0  | 0  | 12.50  | 100.00 |
| 3         | 0  | 0  | 8 | 6  | 0  | 0 | 2 | 0  | 0  | 1            | 0  | 0 | 0  | 0  | 1 | 0  | 0  | 55.56  | 20.83  |
| 4         | 2  | 1  | 2 | 54 | 0  | 0 | 0 | 0  | 0  | 0            | 0  | 0 | 0  | 1  | 0 | 0  | 0  | 100.00 | 20.00  |
| 5         | 0  | 0  | 0 | 17 | 29 | 3 | 0 | 0  | 0  | 0            | 0  | 0 | 0  | 0  | 0 | 0  | 0  | 18.75  | 30.00  |
| 6         | 0  | 1  | 0 | 4  | 2  | 8 | 0 | 0  | 0  | 0            | 0  | 0 | 0  | 0  | 0 | 0  | 0  | 38.46  | 29.41  |
| 7         | 0  | 0  | 0 | 0  | 0  | 0 | 5 | 0  | 0  | 0            | 0  | 0 | 0  | 0  | 0 | 0  | 0  | 100.00 | 100.00 |
| 8         | 1  | 0  | 1 | 1  | 0  | 0 | 0 | 76 | 0  | 0            | 0  | 0 | 0  | 0  | 4 | 0  | 0  | 100.00 | 95.45  |
| 9         | 0  | 0  | 0 | 0  | 0  | 0 | 0 | 0  | 35 | 0            | 0  | 0 | 0  | 0  | 0 | 0  | 0  | 25.00  | 1.16   |
| 10        | 2  | 0  | 1 | 2  | 0  | 0 | 0 | 19 | 0  | 4            | 0  | 0 | 0  | 14 | 1 | 0  | 0  | 50.00  | 100.00 |
| A         | 0  | 0  | 0 | 0  | 0  | 0 | 0 | 0  | 0  | 0            | 43 | 0 | 1  | 0  | 0 | 0  | 0  | 68.62  | 88.17  |
| B         | 0  | 0  | 0 | 0  | 0  | 0 | 0 | 0  | 9  | 0            | 11 | 6 | 1  | 0  | 0 | 9  | 0  | 60.71  | 86.08  |
| C         | 0  | 0  | 0 | 1  | 1  | 0 | 0 | 0  | 11 | 0            | 25 | 1 | 22 | 7  | 0 | 15 | 0  | 73.53  | 80.65  |
| D         | 0  | 0  | 0 | 0  | 0  | 0 | 0 | 0  | 0  | 0            | 0  | 0 | 0  | 11 | 0 | 0  | 0  | 92.19  | 99.16  |
| E         | 1  | 0  | 0 | 0  | 0  | 0 | 0 | 0  | 3  | 0            | 0  | 0 | 0  | 0  | 8 | 12 | 0  | 100.00 | 40.00  |
| F         | 0  | 0  | 0 | 0  | 0  | 0 | 0 | 0  | 0  | 0            | 0  | 0 | 0  | 0  | 1 | 40 | 18 | 100.00 | 10.00  |
| G         | 0  | 0  | 0 | 0  | 0  | 0 | 0 | 0  | 0  | 0            | 0  | 0 | 0  | 0  | 0 | 0  | 86 | 100.00 | 100.00 |
| OA=66.20% |    |    |   |    |    |   |   |    |    | Kappa=0.6336 |    |   |    |    |   |    |    |        |        |

**Table S4.** Comparison of the temperature of sample points in the study area with the inversion temperature (unit: °C).

| Serial No. | Site/Measurement point              | 2013           |       | 2016           |       | 2021           |       |
|------------|-------------------------------------|----------------|-------|----------------|-------|----------------|-------|
|            |                                     | T <sub>a</sub> | LST   | T <sub>a</sub> | LST   | T <sub>a</sub> | LST   |
| 1          | Wushan weather station              | 41.68          | 41.05 | 47.68          | 48.05 | 42.91          | 43.85 |
| 2          | Daming Food Street                  | 42.92          | 43.56 | 47.92          | 48.56 | 44.65          | 45.54 |
| 3          | Zuohai Park                         | 40.02          | 40.26 | 40.92          | 41.26 | 38.95          | 39.59 |
| 4          | Gushan Mountain                     | 38.10          | 38.92 | 39.05          | 39.90 | 39.01          | 39.49 |
| 5          | Fujian Normal University (Cangshan) | 41.91          | 41.82 | 42.91          | 43.82 | 43.15          | 44.20 |

Note: T<sub>a</sub> indicates atmospheric temperature.
